# Supplementary material
Source: PubMed Central journal article supplement (PMC6174091)

Supplementary Figure 2

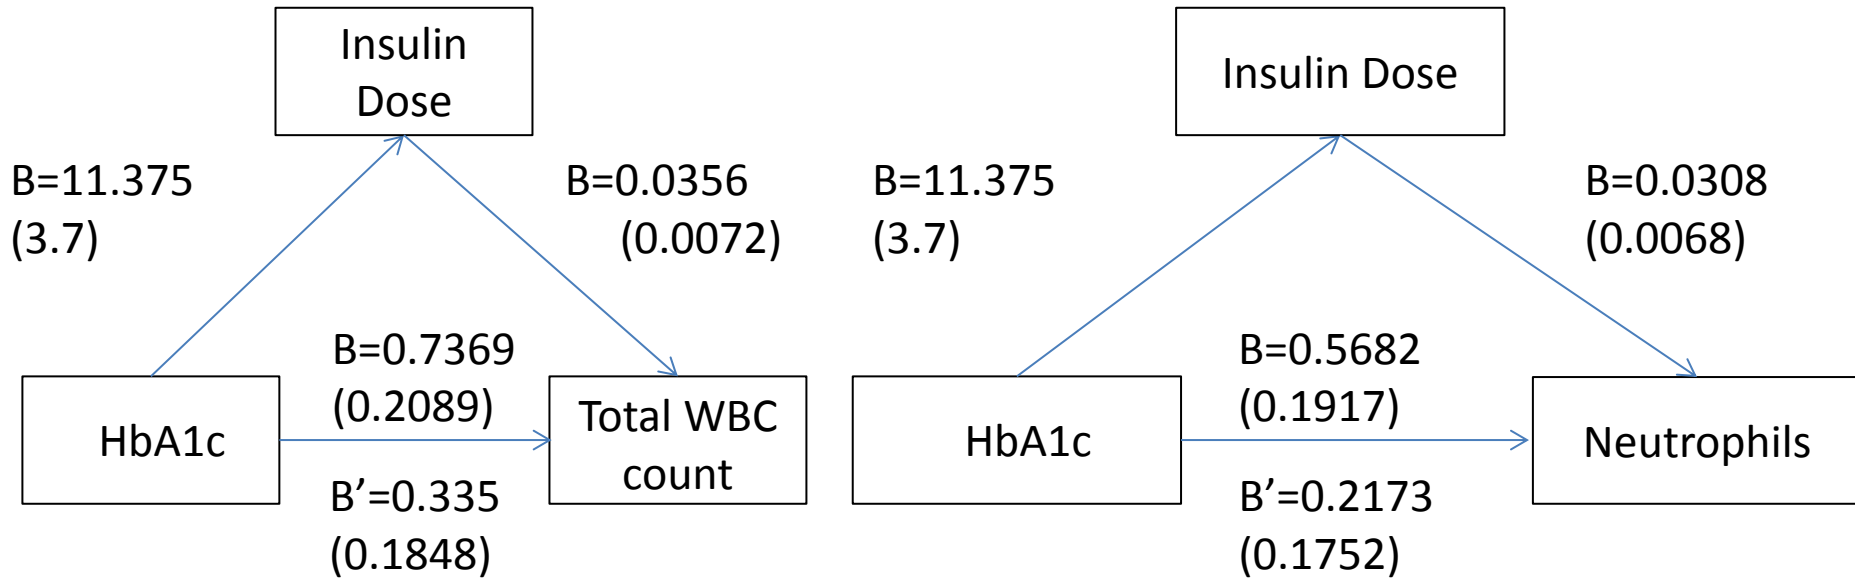

Supplement: NIHMS1503122-supplement-1.pdf [file NIHMS1503122-supplement-1.pdf]
